# Supplementary material for: Biomimetic membrane control of block copolymer vesicles with tunable wall thickness
Source: Royal Society of Chemistry journal article supplement (doi:10.1039/c2sm26882e), 2013-01-01
Supplement: c2sm26882e.pdf [file c2sm26882e.pdf]

# **Biomimetic membrane control of block copolymer vesicles with tunable wall thickness**

Supplementary Information

**Mengying Xiao,<sup>a</sup> Jiannan Liu,<sup>b</sup> Jiexin Yang,<sup>b</sup> Rong Wang\*<sup>b</sup> and Daiqian Xie\*<sup>a</sup>**

<sup>a</sup> Institute of Theoretical and Computational Chemistry, Key Laboratory of Mesoscopic Chemistry, School of Chemistry and Chemical Engineering, Nanjing University, Nanjing 210093, China

<sup>b</sup> Department of Polymer Science and Engineering, State Key Laboratory of Coordination Chemistry, Nanjing National Laboratory of Microstructures, School of Chemistry and Chemical Engineering, Nanjing University, Nanjing 210093, China

Email: rong\_wang73@hotmail.com, dqxie@nju.edu.cn

**Table S1.** Summary of the vesicle (micelle) sizes and cavity sizes with corresponding wall thicknesses for six groups of vesicles with  $a_{BS} = 75$  at  $t = 12000$ .

| $N$                                                          | $r_{\text{cavity}}$ | $d_{\text{inner}}$ | $d$ | $d_{\text{outer}}$ | $R$ |
|--------------------------------------------------------------|---------------------|--------------------|-----|--------------------|-----|
| A <sub>1</sub> B <sub>5</sub> A <sub>1</sub> block copolymer |                     |                    |     |                    |     |
| 679                                                          | 1.0                 | 0.3                | 2.1 | 0.5                | 3.9 |
| 805                                                          | 1.1                 | 0.3                | 2.4 | 0.3                | 4.1 |
| 1211                                                         | 1.5                 | 0.4                | 2.7 | 0.4                | 5.0 |
| 1309                                                         | 1.6                 | 0.4                | 2.9 | 0.5                | 5.4 |
| 1596                                                         | 1.8                 | 0.4                | 3.0 | 0.4                | 5.6 |
| 2499                                                         | 1.7                 | 0.4                | 4.4 | 0.4                | 6.9 |
| A <sub>1</sub> B <sub>7</sub> A <sub>1</sub> block copolymer |                     |                    |     |                    |     |
| 125                                                          |                     |                    |     |                    | 2.4 |
| 486                                                          | 0.6                 | 0.3                | 2.2 | 0.4                | 3.5 |
| 657                                                          | 0.7                 | 0.3                | 2.7 | 0.4                | 4.1 |
| 810                                                          | 0.8                 | 0.3                | 2.8 | 0.3                | 4.2 |
| 820                                                          | 0.9                 | 0.3                | 2.7 | 0.4                | 4.3 |
| 828                                                          | 0.6                 | 0.4                | 3.1 | 0.4                | 4.5 |
| 828                                                          | 0.9                 | 0.3                | 3.2 | 0.4                | 4.8 |
| 1566                                                         | 1.5                 | 0.3                | 3.4 | 0.4                | 5.6 |
| 1980                                                         | 1.8                 | 0.3                | 3.4 | 0.4                | 5.9 |
| A <sub>1</sub> B <sub>9</sub> A <sub>1</sub> block copolymer |                     |                    |     |                    |     |

|                                |     |     |     |     |     |
|--------------------------------|-----|-----|-----|-----|-----|
| 242                            |     |     |     |     | 2.5 |
| 385                            | 0.5 | 0.1 | 2.3 | 0.4 | 3.2 |
| 627                            | 0.6 | 0.4 | 2.5 | 0.5 | 4.0 |
| 1100                           | 0.7 | 0.3 | 3.6 | 0.2 | 4.8 |
| 1716                           | 1.5 | 0.2 | 3.6 | 0.2 | 5.5 |
| 1903                           | 1.2 | 0.4 | 3.7 | 0.3 | 5.6 |
| 2123                           | 1.6 | 0.3 | 3.6 | 0.3 | 5.8 |
| $A_1B_{11}A_1$ block copolymer |     |     |     |     |     |
| 182                            |     |     |     |     | 2.5 |
| 468                            | 0.4 | 0.2 | 2.7 | 0.3 | 3.6 |
| 676                            | 0.6 | 0.3 | 2.6 | 0.4 | 3.9 |
| 728                            | 0.6 | 0.3 | 2.6 | 0.4 | 4.0 |
| 858                            | 0.8 | 0.3 | 2.8 | 0.4 | 4.3 |
| 923                            | 0.6 | 0.3 | 3.2 | 0.3 | 4.4 |
| 2067                           | 1.6 | 0.2 | 3.5 | 0.4 | 5.7 |
| 2197                           | 1.5 | 0.3 | 3.6 | 0.5 | 5.9 |
| $A_1B_{13}A_1$ block copolymer |     |     |     |     |     |
| 360                            |     |     |     |     | 3.3 |
| 480                            | 0.2 | 0.1 | 2.9 | 0.4 | 3.6 |
| 1080                           | 0.7 | 0.5 | 3.2 | 0.5 | 4.9 |
| 1365                           | 0.8 | 0.3 | 3.9 | 0.3 | 5.3 |
| 2235                           | 1.3 | 0.4 | 4.0 | 0.5 | 6.2 |

|                                                               |     |     |     |     |     |
|---------------------------------------------------------------|-----|-----|-----|-----|-----|
| 2580                                                          | 1.4 | 0.3 | 4.3 | 0.4 | 6.5 |
| A <sub>1</sub> B <sub>15</sub> A <sub>1</sub> block copolymer |     |     |     |     |     |
| 493                                                           |     |     |     |     | 3.6 |
| 918                                                           | 0.6 | 0.4 | 3.3 | 0.5 | 4.8 |
| 1139                                                          | 0.8 | 0.4 | 3.2 | 0.4 | 4.8 |
| 1394                                                          | 0.8 | 0.6 | 3.3 | 0.5 | 5.2 |
| 1666                                                          | 1.1 | 0.6 | 3.4 | 0.5 | 5.6 |
| 2482                                                          | 1.5 | 0.3 | 3.7 | 0.5 | 6.0 |

**Table S2.** Summary of the vesicle (micelle) sizes and cavity sizes with corresponding wall thicknesses for six groups of vesicles with  $a_{BS} = 110$  at  $t = 12000$ .

| $N$                                                          | $r_{\text{cavity}}$ | $d_{\text{inner}}$ | $d$ | $d_{\text{outer}}$ | $R$ |
|--------------------------------------------------------------|---------------------|--------------------|-----|--------------------|-----|
| A <sub>1</sub> B <sub>5</sub> A <sub>1</sub> block copolymer |                     |                    |     |                    |     |
| 196                                                          | 0.4                 | 0.2                | 1.7 | 0.3                | 2.6 |
| 707                                                          | 0.8                 | 0.5                | 2.4 | 0.5                | 4.2 |
| 721                                                          | 1.0                 | 0.3                | 2.4 | 0.4                | 4.1 |
| 742                                                          | 1.0                 | 0.4                | 2.4 | 0.5                | 4.3 |
| 812                                                          | 1.2                 | 0.4                | 2.1 | 0.5                | 4.2 |
| 791                                                          | 1.1                 | 0.3                | 2.3 | 0.5                | 4.2 |
| 1085                                                         | 1.4                 | 0.3                | 2.4 | 0.5                | 4.6 |
| 3045                                                         | 2.4                 | 0.4                | 3.7 | 0.6                | 7.1 |
| A <sub>1</sub> B <sub>7</sub> A <sub>1</sub> block copolymer |                     |                    |     |                    |     |
| 297                                                          | 0.4                 | 0.2                | 2.3 | 0.3                | 3.2 |
| 333                                                          | 0.3                 | 0.3                | 2.2 | 0.2                | 3.0 |
| 387                                                          | 0.3                 | 0.3                | 2.3 | 0.4                | 3.3 |
| 441                                                          | 0.5                 | 0.3                | 2.3 | 0.4                | 3.5 |
| 522                                                          | 0.8                 | 0.2                | 2.2 | 0.4                | 3.6 |
| 621                                                          | 0.8                 | 0.3                | 2.4 | 0.5                | 4.0 |
| 747                                                          | 0.9                 | 0.4                | 2.5 | 0.4                | 4.2 |
| 1287                                                         | 1.4                 | 0.2                | 3.1 | 0.5                | 5.2 |

|                                                               |     |     |     |     |     |
|---------------------------------------------------------------|-----|-----|-----|-----|-----|
| 1476                                                          | 1.5 | 0.2 | 3.2 | 0.5 | 5.4 |
| 1989                                                          | 1.1 | 0.4 | 3.9 | 0.4 | 5.9 |
| A <sub>1</sub> B <sub>9</sub> A <sub>1</sub> block copolymer  |     |     |     |     |     |
| 781                                                           | 1.0 | 0.2 | 2.6 | 0.4 | 4.2 |
| 836                                                           | 0.7 | 0.4 | 2.6 | 0.4 | 4.1 |
| 836                                                           | 0.9 | 0.3 | 2.6 | 0.4 | 4.2 |
| 946                                                           | 0.7 | 0.4 | 3.1 | 0.3 | 4.5 |
| 1034                                                          | 0.8 | 0.4 | 3.2 | 0.2 | 4.6 |
| 3663                                                          | 2.1 | 0.3 | 4.2 | 0.4 | 7.0 |
| A <sub>1</sub> B <sub>11</sub> A <sub>1</sub> block copolymer |     |     |     |     |     |
| 195                                                           | 0.5 |     |     |     | 2.7 |
| 572                                                           | 0.4 | 0.4 | 2.6 | 0.4 | 3.8 |
| 884                                                           | 0.7 | 0.3 | 3.0 | 0.3 | 4.3 |
| 1144                                                          | 0.9 | 0.5 | 3.0 | 0.4 | 4.8 |
| 1495                                                          | 1.0 | 0.3 | 3.4 | 0.3 | 5.0 |
| 1716                                                          | 1.2 | 0.3 | 3.6 | 0.4 | 5.5 |
| 2093                                                          | 1.6 | 0.3 | 3.7 | 0.2 | 5.8 |
| A <sub>1</sub> B <sub>13</sub> A <sub>1</sub> block copolymer |     |     |     |     |     |
| 375                                                           |     |     |     |     | 3.1 |
| 630                                                           | 0.4 | 0.1 | 3.3 | 0.2 | 4.0 |
| 765                                                           | 0.6 | 0.3 | 3.0 | 0.3 | 4.2 |
| 900                                                           | 0.6 | 0.4 | 2.9 | 0.4 | 4.3 |

|                                |     |     |     |     |     |
|--------------------------------|-----|-----|-----|-----|-----|
| 1320                           | 0.9 | 0.3 | 3.3 | 0.5 | 5.0 |
| 1995                           | 1.2 | 0.3 | 3.8 | 0.4 | 5.7 |
| 2115                           | 1.4 | 0.4 | 3.7 | 0.3 | 5.8 |
| $A_1B_{15}A_1$ block copolymer |     |     |     |     |     |
| 357                            | 0.3 |     |     |     | 3.1 |
| 765                            | 0.6 | 0.1 | 3.1 | 0.2 | 4.0 |
| 1411                           | 0.6 | 0.5 | 3.5 | 0.3 | 4.9 |
| 1513                           | 1.2 | 0.2 | 3.5 | 0.3 | 5.2 |
| 1921                           | 1.1 | 0.3 | 4.1 | 0.3 | 5.8 |
| 2125                           | 0.9 | 0.4 | 4.2 | 0.3 | 5.8 |

**Table S3.** The variation of the area densities of the A-block in both coronas with the vesicle size with  $a_{BS} = 75$  at  $t = 12000$ .

| $N$                                                          | $r_{\text{cavity}} (r_i)$ | $N_i$ | $N_i/4\pi r_i^2$ | $R (r_o)$ | $N_o$ | $N_o/4\pi r_o^2$ |
|--------------------------------------------------------------|---------------------------|-------|------------------|-----------|-------|------------------|
| A <sub>1</sub> B <sub>5</sub> A <sub>1</sub> block copolymer |                           |       |                  |           |       |                  |
| 679                                                          | 1.0                       | 53    | 4.2176           | 3.9       | 141   | 0.7377           |
| 805                                                          | 1.1                       | 62    | 4.0775           | 4.1       | 168   | 0.7953           |
| 1211                                                         | 1.5                       | 109   | 3.8550           | 5.0       | 237   | 0.7543           |
| 1309                                                         | 1.6                       | 124   | 3.8545           | 5.4       | 250   | 0.6822           |
| 1596                                                         | 1.8                       | 157   | 3.8560           | 5.6       | 299   | 0.7587           |
| 2499                                                         | 1.7                       | 263   | 7.2418           | 6.9       | 451   | 0.7538           |
| A <sub>1</sub> B <sub>7</sub> A <sub>1</sub> block copolymer |                           |       |                  |           |       |                  |
| 125                                                          |                           |       |                  | 2.4       |       |                  |
| 486                                                          | 0.6                       | 17    | 3.7578           | 3.5       | 91    | 0.5911           |
| 657                                                          | 0.7                       | 34    | 5.5217           | 4.1       | 112   | 0.5302           |
| 810                                                          | 0.8                       | 40    | 4.9735           | 4.2       | 140   | 0.6315           |
| 820                                                          | 0.9                       | 43    | 4.2244           | 4.3       | 139   | 0.5982           |
| 828                                                          | 0.6                       | 36    | 7.9577           | 4.5       | 148   | 0.5816           |
| 828                                                          | 0.9                       | 43    | 4.2244           | 4.8       | 141   | 0.4870           |
| 1566                                                         | 1.5                       | 106   | 3.7489           | 5.6       | 242   | 0.6140           |
| 1980                                                         | 1.8                       | 141   | 3.4630           | 5.9       | 299   | 0.6835           |
| A <sub>1</sub> B <sub>9</sub> A <sub>1</sub> block copolymer |                           |       |                  |           |       |                  |



|                                                               |     |     |        |     |     |         |
|---------------------------------------------------------------|-----|-----|--------|-----|-----|---------|
| 242                                                           |     |     |        | 2.5 |     |         |
| 385                                                           | 0.5 | 5   | 1.5915 | 3.2 | 65  | 0.5051  |
| 627                                                           | 0.6 | 13  | 2.8736 | 4.0 | 101 | 0.5023  |
| 1100                                                          | 0.7 | 46  | 7.4705 | 4.8 | 154 | 0.5319  |
| 1716                                                          | 1.5 | 84  | 2.9708 | 5.5 | 228 | 0.5997  |
| 1903                                                          | 1.2 | 96  | 5.3051 | 5.6 | 250 | 0.6343  |
| 2123                                                          | 1.6 | 112 | 3.4815 | 5.8 | 274 | 0.6481  |
| A <sub>1</sub> B <sub>11</sub> A <sub>1</sub> block copolymer |     |     |        |     |     |         |
| 182                                                           |     |     |        | 2.5 |     |         |
| 468                                                           | 0.4 | 4   | 1.9894 | 3.6 | 68  | 0.41754 |
| 676                                                           | 0.6 | 10  | 2.2104 | 3.9 | 94  | 0.4918  |
| 728                                                           | 0.6 | 12  | 2.6525 | 4.0 | 100 | 0.4973  |
| 858                                                           | 0.8 | 20  | 2.4868 | 4.3 | 112 | 0.4820  |
| 923                                                           | 0.6 | 23  | 5.0841 | 4.4 | 119 | 0.4891  |
| 2067                                                          | 1.6 | 82  | 2.5489 | 5.7 | 236 | 0.5780  |
| 2197                                                          | 1.5 | 88  | 3.1123 | 5.9 | 250 | 0.5715  |
| A <sub>1</sub> B <sub>13</sub> A <sub>1</sub> block copolymer |     |     |        |     |     |         |
| 360                                                           |     |     |        | 3.3 |     |         |
| 480                                                           | 0.2 | 1   | 1.9894 | 3.6 | 63  | 0.3868  |
| 1080                                                          | 0.7 | 24  | 3.8976 | 4.9 | 120 | 0.3977  |
| 1365                                                          | 0.8 | 30  | 3.7301 | 5.3 | 152 | 0.4306  |
| 2235                                                          | 1.3 | 65  | 3.0606 | 6.2 | 233 | 0.4823  |

|                                                               |     |    |        |     |     |        |
|---------------------------------------------------------------|-----|----|--------|-----|-----|--------|
| 2580                                                          | 1.4 | 79 | 3.2074 | 6.5 | 265 | 0.4991 |
| A <sub>1</sub> B <sub>15</sub> A <sub>1</sub> block copolymer |     |    |        |     |     |        |
| 493                                                           |     |    |        | 3.6 |     |        |
| 918                                                           | 0.6 | 9  | 1.9894 | 4.8 | 99  | 0.3419 |
| 1139                                                          | 0.8 | 14 | 1.7407 | 4.8 | 120 | 0.4144 |
| 1394                                                          | 0.8 | 23 | 2.8598 | 5.2 | 141 | 0.4149 |
| 1666                                                          | 1.1 | 33 | 2.1702 | 5.6 | 163 | 0.4136 |
| 2482                                                          | 1.5 | 57 | 2.0159 | 6.0 | 235 | 0.5194 |

**Table S4.** The variation of the area densities of the A-block in both coronas with the vesicle size with  $a_{BS} = 110$  at  $t = 12000$ .

| $N$                                                          | $r_{\text{cavity}} (r_i)$ | $N_i$ | $N_i/4\pi r_i^2$ | $R (r_o)$ | $N_o$ | $N_o/4\pi r_o^2$ |
|--------------------------------------------------------------|---------------------------|-------|------------------|-----------|-------|------------------|
| A <sub>1</sub> B <sub>5</sub> A <sub>1</sub> block copolymer |                           |       |                  |           |       |                  |
| 196                                                          | 0.4                       | 4     | 1.9894           | 2.6       | 52    | 0.6121           |
| 707                                                          | 0.8                       | 52    | 6.4656           | 4.2       | 150   | 0.6766           |
| 721                                                          | 1.0                       | 55    | 4.3767           | 4.1       | 151   | 0.7148           |
| 742                                                          | 1.0                       | 59    | 4.6950           | 4.3       | 153   | 0.6584           |
| 812                                                          | 1.2                       | 65    | 3.5920           | 4.2       | 167   | 0.7533           |
| 791                                                          | 1.1                       | 59    | 3.8802           | 4.2       | 167   | 0.7533           |
| 1085                                                         | 1.4                       | 98    | 3.9788           | 4.6       | 212   | 0.7972           |
| 3045                                                         | 2.4                       | 328   | 4.5314           | 7.1       | 542   | 0.8556           |
| A <sub>1</sub> B <sub>7</sub> A <sub>1</sub> block copolymer |                           |       |                  |           |       |                  |
| 297                                                          | 0.4                       | 3     | 1.4920           | 3.2       | 63    | 0.4895           |
| 333                                                          | 0.3                       | 6     | 5.3051           | 3.0       | 68    | 0.6012           |
| 387                                                          | 0.3                       | 9     | 7.9577           | 3.3       | 77    | 0.5626           |
| 441                                                          | 0.5                       | 13    | 4.1380           | 3.5       | 85    | 0.5521           |
| 522                                                          | 0.8                       | 22    | 2.7354           | 3.6       | 94    | 0.5771           |
| 621                                                          | 0.8                       | 27    | 3.3571           | 4.0       | 111   | 0.5520           |
| 747                                                          | 0.9                       | 39    | 3.8315           | 4.2       | 127   | 0.5729           |
| 1287                                                         | 1.4                       | 78    | 3.1668           | 5.2       | 208   | 0.6121           |

|                                                               |     |     |        |     |     |        |
|---------------------------------------------------------------|-----|-----|--------|-----|-----|--------|
| 1476                                                          | 1.5 | 100 | 3.5367 | 5.4 | 228 | 0.6222 |
| 1989                                                          | 1.1 | 132 | 8.6811 | 5.9 | 310 | 0.7086 |
| A <sub>1</sub> B <sub>9</sub> A <sub>1</sub> block copolymer  |     |     |        |     |     |        |
| 781                                                           | 1.0 | 28  | 2.2281 | 4.2 | 114 | 0.5142 |
| 836                                                           | 0.7 | 31  | 5.0344 | 4.1 | 121 | 0.5728 |
| 836                                                           | 0.9 | 28  | 2.7508 | 4.2 | 124 | 0.5593 |
| 946                                                           | 0.7 | 33  | 5.3593 | 4.5 | 139 | 0.5462 |
| 1034                                                          | 0.8 | 37  | 4.6005 | 4.6 | 151 | 0.5678 |
| 3663                                                          | 2.1 | 219 | 3.9518 | 7.0 | 448 | 0.7275 |
| A <sub>1</sub> B <sub>11</sub> A <sub>1</sub> block copolymer |     |     |        |     |     |        |
| 195                                                           | 0.5 |     |        | 2.7 |     |        |
| 572                                                           | 0.4 | 6   | 2.9841 | 3.8 | 82  | 0.4518 |
| 884                                                           | 0.7 | 18  | 2.9232 | 4.3 | 118 | 0.5078 |
| 1144                                                          | 0.9 | 21  | 2.0631 | 4.8 | 155 | 0.5353 |
| 1495                                                          | 1.0 | 41  | 3.2626 | 5.0 | 189 | 0.6016 |
| 1716                                                          | 1.2 | 55  | 3.0394 | 5.5 | 209 | 0.5498 |
| 2093                                                          | 1.6 | 80  | 2.4868 | 5.8 | 242 | 0.5724 |
| A <sub>1</sub> B <sub>13</sub> A <sub>1</sub> block copolymer |     |     |        |     |     |        |
| 375                                                           |     |     |        | 3.1 |     |        |
| 630                                                           | 0.4 | 3   | 1.4920 | 4.0 | 81  | 0.4028 |
| 765                                                           | 0.6 | 12  | 2.6525 | 4.2 | 90  | 0.4060 |
| 900                                                           | 0.6 | 12  | 2.6525 | 4.3 | 108 | 0.4648 |

|                                |     |    |        |     |     |        |
|--------------------------------|-----|----|--------|-----|-----|--------|
| 1320                           | 0.9 | 18 | 1.7683 | 5.0 | 158 | 0.5029 |
| 1995                           | 1.2 | 51 | 2.8183 | 5.7 | 215 | 0.5266 |
| 2115                           | 1.4 | 61 | 2.4766 | 5.8 | 221 | 0.5227 |
| $A_1B_{15}A_1$ block copolymer |     |    |        |     |     |        |
| 357                            | 0.3 |    |        | 3.1 |     |        |
| 765                            | 0.6 | 1  | 0.2210 | 4.0 | 89  | 0.4426 |
| 1411                           | 0.6 | 16 | 3.5367 | 4.9 | 150 | 0.4971 |
| 1513                           | 1.2 | 26 | 1.4368 | 5.2 | 152 | 0.4473 |
| 1921                           | 1.1 | 21 | 1.3811 | 5.8 | 205 | 0.4849 |
| 2125                           | 0.9 | 31 | 3.0455 | 5.8 | 219 | 0.5180 |

**Table S5.** The bridge fraction  $\Phi_b$  of the obtained vesicles at  $t = 12000$ .

| $a_{BS} = 75$                                                |        |      |          | $a_{BS} = 110$ |        |      |          |
|--------------------------------------------------------------|--------|------|----------|----------------|--------|------|----------|
| $N$                                                          | bridge | loop | $\Phi_b$ | $N$            | bridge | loop | $\Phi_b$ |
| A <sub>1</sub> B <sub>5</sub> A <sub>1</sub> block copolymer |        |      |          |                |        |      |          |
| 679                                                          | 53     | 44   | 0.5463   | 196            | 4      | 24   | 0.1428   |
| 805                                                          | 62     | 53   | 0.5391   | 707            | 52     | 49   | 0.5148   |
| 1211                                                         | 109    | 64   | 0.6300   | 721            | 55     | 48   | 0.5339   |
| 1309                                                         | 124    | 63   | 0.6631   | 742            | 59     | 47   | 0.5566   |
| 1596                                                         | 157    | 71   | 0.6886   | 812            | 65     | 51   | 0.5603   |
| 2499                                                         | 263    | 94   | 0.7366   | 791            | 59     | 54   | 0.5221   |
|                                                              |        |      |          | 1085           | 98     | 57   | 0.6322   |
|                                                              |        |      |          | 3045           | 328    | 107  | 0.7540   |
| A <sub>1</sub> B <sub>7</sub> A <sub>1</sub> block copolymer |        |      |          |                |        |      |          |
| 125                                                          |        |      |          | 297            | 3      | 30   | 0.0909   |
| 486                                                          | 17     | 37   | 0.3148   | 333            | 6      | 31   | 0.1621   |
| 657                                                          | 34     | 39   | 0.4657   | 387            | 9      | 34   | 0.2093   |
| 810                                                          | 40     | 50   | 0.4444   | 441            | 13     | 36   | 0.2653   |
| 820                                                          | 43     | 48   | 0.4725   | 522            | 22     | 36   | 0.3793   |
| 828                                                          | 36     | 56   | 0.3913   | 621            | 27     | 42   | 0.3913   |
| 828                                                          | 43     | 49   | 0.4673   | 747            | 39     | 44   | 0.4698   |
| 1566                                                         | 106    | 68   | 0.6092   | 1287           | 78     | 65   | 0.5454   |

|                                                               |     |    |        |      |     |       |        |
|---------------------------------------------------------------|-----|----|--------|------|-----|-------|--------|
| 1980                                                          | 141 | 79 | 0.6409 | 1476 | 100 | 64    | 0.6097 |
|                                                               |     |    |        | 1989 | 132 | 89    | 0.5972 |
| A <sub>1</sub> B <sub>9</sub> A <sub>1</sub> block copolymer  |     |    |        |      |     |       |        |
| 242                                                           |     |    |        | 781  | 28  | 43    | 0.3943 |
| 385                                                           | 5   | 30 | 0.1428 | 836  | 31  | 45    | 0.4078 |
| 627                                                           | 13  | 44 | 0.2280 | 836  | 28  | 48    | 0.3684 |
| 1100                                                          | 46  | 54 | 0.4600 | 946  | 33  | 53    | 0.3837 |
| 1716                                                          | 84  | 72 | 0.5384 | 1034 | 37  | 57    | 0.3936 |
| 1903                                                          | 96  | 77 | 0.5549 | 3663 | 219 | 114.5 | 0.6566 |
| 2123                                                          | 112 | 81 | 0.5803 |      |     |       |        |
| A <sub>1</sub> B <sub>11</sub> A <sub>1</sub> block copolymer |     |    |        |      |     |       |        |
| 182                                                           |     |    |        | 195  |     |       |        |
| 468                                                           | 4   | 32 | 0.1111 | 572  | 6   | 38    | 0.1363 |
| 676                                                           | 10  | 42 | 0.1923 | 884  | 18  | 50    | 0.2647 |
| 728                                                           | 12  | 44 | 0.2142 | 1144 | 21  | 67    | 0.2386 |
| 858                                                           | 20  | 46 | 0.3030 | 1495 | 41  | 74    | 0.3565 |
| 923                                                           | 23  | 48 | 0.3239 | 1716 | 55  | 77    | 0.4166 |
| 2067                                                          | 82  | 77 | 0.5157 | 2093 | 80  | 81    | 0.4968 |
| 2197                                                          | 88  | 81 | 0.5207 |      |     |       |        |
| A <sub>1</sub> B <sub>13</sub> A <sub>1</sub> block copolymer |     |    |        |      |     |       |        |
| 360                                                           |     |    |        | 375  |     |       |        |
| 480                                                           | 1   | 31 | 0.0312 | 630  | 3   | 39    | 0.0714 |

|                                |    |    |        |      |    |    |        |
|--------------------------------|----|----|--------|------|----|----|--------|
| 1080                           | 24 | 48 | 0.3333 | 765  | 12 | 39 | 0.2352 |
| 1365                           | 30 | 61 | 0.3296 | 900  | 12 | 48 | 0.2000 |
| 2235                           | 65 | 84 | 0.4362 | 1320 | 18 | 70 | 0.2045 |
| 2580                           | 79 | 93 | 0.4593 | 1995 | 51 | 82 | 0.3834 |
|                                |    |    |        | 2115 | 61 | 80 | 0.4326 |
| $A_1B_{15}A_1$ block copolymer |    |    |        |      |    |    |        |
| 493                            |    |    |        | 357  |    |    |        |
| 918                            | 9  | 45 | 0.1666 | 765  | 1  | 44 | 0.0222 |
| 1139                           | 14 | 53 | 0.2089 | 1411 | 16 | 67 | 0.1927 |
| 1394                           | 23 | 59 | 0.2804 | 1513 | 26 | 63 | 0.2921 |
| 1666                           | 33 | 65 | 0.3367 | 1921 | 21 | 92 | 0.1858 |
| 2482                           | 57 | 89 | 0.3904 | 2125 | 31 | 94 | 0.2480 |
